# Supplementary material
Source: HighWire-hosted journal article supplement (https://bmjopen.bmj.com/content/12/9/e060281)
Supplement: inline-supplementary-material-1 [file inline-supplementary-material-1.pdf]

## Appendix 1: Medline search strategy

**MEDLINE(R) ALL**

via Ovid <http://ovidsp.ovid.com/>

1946 to October 25, 2019

Searched on: 28<sup>th</sup> October 2019

Records retrieved search B: 13473

Records retrieved search A: 4241

- 1 ((doctor or doctors or physician\$ or medic or medics) adj4 academi\$).ti,ab. (1872)
- 2 ((doctor or doctors or physician\$ or medic or medics) adj4 (professor\$ or dean\$ or program\$ director\$ or lecturer\$ or research fellow\$ or researcher\$)).ti,ab. (1979)
- 3 ((doctor or doctors or physician\$ or medic or medics) adj4 (doctora\$ or predoctora\$ or pre-doctora\$ or postdoctora\$ or post-doctora\$ or postdoc or post-doc or postdocs or post-docs or PhD or PhDs)).ti,ab. (232)
- 4 ((doctor or doctors or physician\$ or medic or medics) adj4 (universit\$ or higher education or research institut\$ or research centre\$ or research center\$)).ti,ab. (1435)
- 5 (medical adj (profession\$ or practitioner\$ or specialist\$) adj4 academi\$).ti,ab. (65)
- 6 (medical adj (profession\$ or practitioner\$ or specialist\$) adj4 (professor\$ or dean\$ or program\$ director\$ or lecturer\$ or research fellow\$ or researcher\$)).ti,ab. (154)
- 7 (medical adj (profession\$ or practitioner\$ or specialist\$) adj4 (doctora\$ or predoctora\$ or pre-doctora\$ or postdoctora\$ or post-doctora\$ or postdoc or post-doc or postdocs or post-docs or PhD or PhDs)).ti,ab. (5)
- 8 (medical adj (profession\$ or practitioner\$ or specialist\$) adj4 (universit\$ or higher education or research institut\$ or research centre\$ or research center\$)).ti,ab. (59)
- 9 ((GP or GPs or general practioner\$) adj4 academi\$).ti,ab. (75)
- 10 ((GP or GPs or general practioner\$) adj4 (professor\$ or dean\$ or program\$ director\$ or lecturer\$ or research fellow\$ or researcher\$)).ti,ab. (96)
- 11 ((GP or GPs or general practioner\$) adj4 (doctora\$ or predoctora\$ or pre-doctora\$ or postdoctora\$ or post-doctora\$ or postdoc or post-doc or postdocs or post-docs or PhD or PhDs)).ti,ab. (4)
- 12 ((GP or GPs or general practioner\$) adj4 (universit\$ or higher education or research institut\$ or research centre\$ or research center\$)).ti,ab. (59)
- 13 ((dentist or dentists) adj4 academi\$).ti,ab. (63)
- 14 ((dentist or dentists) adj4 (professor\$ or dean\$ or program\$ director\$ or lecturer\$ or research fellow\$ or researcher\$)).ti,ab. (73)
- 15 ((dentist or dentists) adj4 (doctora\$ or predoctora\$ or pre-doctora\$ or postdoctora\$ or post-doctora\$ or postdoc or post-doc or postdocs or post-docs or PhD or PhDs)).ti,ab. (20)
- 16 ((dentist or dentists) adj4 (universit\$ or higher education or research institut\$ or research centre\$ or research center\$)).ti,ab. (72)
- 17 ((dental or dentistry) adj (profession\$ or practitioner\$ or specialist\$) adj4 academi\$).ti,ab. (24)
- 18 ((dental or dentistry) adj (profession\$ or practitioner\$ or specialist\$) adj4 (professor\$ or dean\$ or program\$ director\$ or lecturer\$ or research fellow\$ or researcher\$)).ti,ab. (22)
- 19 ((dental or dentistry) adj (profession\$ or practitioner\$ or specialist\$) adj4 (doctora\$ or predoctora\$ or pre-doctora\$ or postdoctora\$ or post-doctora\$ or postdoc or post-doc or postdocs or post-docs or PhD or PhDs)).ti,ab. (1)
- 20 ((dental or dentistry) adj (profession\$ or practitioner\$ or specialist\$) adj4 (universit\$ or higher education or research institut\$ or research centre\$ or research center\$)).ti,ab. (23)
- 21 or/1-20 (6146)
- 22 ((consultant\$ or registrar\$ or associate specialist\$ or staff grade\$ or house officer\$ or houseman or housemen or housestaff) adj4 academi\$).ti,ab. (139)
- 23 ((consultant\$ or registrar\$ or associate specialist\$ or staff grade\$ or house officer\$ or houseman or housemen or housestaff) adj4 (professor\$ or dean\$ or program\$ director\$ or lecturer\$ or research fellow\$ or researcher\$)).ti,ab. (242)

- 24 ((consultant\$ or registrar\$ or associate specialist\$ or staff grade\$ or house officer\$ or houseman or housemen or housestaff) adj4 (doctora\$ or predoctora\$ or pre-doctora\$ or postdoctora\$ or post-doctora\$ or postdoc or post-doc or postdocs or post-docs or PhD or PhDs)).ti,ab. (18)
- 25 ((consultant\$ or registrar\$ or associate specialist\$ or staff grade\$ or house officer\$ or houseman or housemen or housestaff) adj4 (universit\$ or higher education or research institut\$ or research centre\$ or research center\$)).ti,ab. (166)
- 26 ((medical or specialt\$ or specialist\$ or clinical or surgical) adj4 train\$ adj4 academi\$).ti,ab. (445)
- 27 ((medical or specialt\$ or specialist\$ or clinical or surgical) adj4 train\$ adj4 (professor\$ or dean\$ or program\$ director\$ or lecturer\$ or research fellow\$ or researcher\$)).ti,ab. (188)
- 28 ((medical or specialt\$ or specialist\$ or clinical or surgical) adj4 train\$ adj4 (doctora\$ or predoctora\$ or pre-doctora\$ or postdoctora\$ or post-doctora\$ or postdoc or post-doc or postdocs or post-docs or PhD or PhDs)).ti,ab. (116)
- 29 ((medical or specialt\$ or specialist\$ or clinical or surgical) adj4 train\$ adj4 (universit\$ or higher education or research institut\$ or research centre\$ or research center\$)).ti,ab. (468)
- 30 ((FY1 or FY2 or SHO or JHO or FY train\$ or CMT or CST) adj10 academi\$).ti,ab. (4)
- 31 ((FY1 or FY2 or SHO or JHO or FY train\$ or CMT or CST) adj10 (professor\$ or dean\$ or program\$ director\$ or lecturer\$ or research fellow\$ or researcher\$)).ti,ab. (20)
- 32 ((FY1 or FY2 or SHO or JHO or FY train\$ or CMT or CST) adj10 (doctora\$ or predoctora\$ or pre-doctora\$ or postdoctora\$ or post-doctora\$ or postdoc or post-doc or postdocs or post-docs or PhD or PhDs)).ti,ab. (0)
- 33 ((FY1 or FY2 or SHO or JHO or FY train\$ or CMT or CST) adj10 (universit\$ or higher education or research institut\$ or research centre\$ or research center\$)).ti,ab. (31)
- 34 or/22-33 (1774)
- 35 (facult\$ adj5 (medical or medicine or dental or dentistry or clinical) adj5 (academi\$ or research\$ or scholar\$)).ti,ab. (1313)
- 36 (facult\$ adj5 (medical or medicine or dental or dentistry or clinical) adj5 (professor\$ or dean\$ or program\$ director\$ or lecturer\$ or research fellow\$ or researcher\$)).ti,ab. (399)
- 37 (facult\$ adj5 (medical or medicine or dental or dentistry or clinical) adj5 (doctora\$ or predoctora\$ or pre-doctora\$ or postdoctora\$ or post-doctora\$ or postdoc or post-doc or postdocs or post-docs or PhD or PhDs)).ti,ab. (79)
- 38 or/35-37 (1705)
- 39 exp Physicians/ (133681)
- 40 exp Dentists/ (18486)
- 41 Faculty, Medical/ (12770)
- 42 Faculty, Dental/ (2398)
- 43 Academic Medical Centers/ (17857)
- 44 39 or 40 or 41 or 42 or 43 (180811)
- 45 Research Personnel/ (15675)
- 46 Universities/ (38946)
- 47 research/ or biomedical research/ or dental research/ (267864)
- 48 45 or 46 or 47 (313057)
- 49 44 and 48 (7101)
- 50 21 or 34 or 38 or 49 (15969)
- 51 (academic adj (medicine or dentistry or primary care)).ti,ab. (2568)
- 52 (academic adj2 (an?esthesi\$ or an?estheti\$ or oncolog\$ or emergency medicine or radiolog\$ or intensive care or intensivist\$ or obstetric\$ or gyn?ecolog\$ or ophthalmolog\$ or paediatric\$ or pediatric\$ or patholog\$ or psychiatr\$ or public health or surgery or surgeon\$)).ti,ab. (4937)
- 53 51 or 52 (7395)
- 54 ((clinical or clinician\$ or medical or dental or dentistry) adj academi\$).ti,ab. (780)
- 55 ((clinical or clinician\$ or medical or dental or dentistry) adj (lecturer\$ or lectureship\$)).ti,ab. (61)
- 56 ((clinical or clinician\$ or medical or dental or dentistry) adj professor\$).ti,ab. (177)

- 57 ((clinical or clinician\$ or medical or dental or dentistry) adj fellow\$.ti,ab. (325)  
 58 ((clinical or clinician\$ or medical or dental or dentistry) adj research fellow\$.ti,ab. (37)  
 59 in-practice fellow\$.ti,ab. (8)  
 60 clinical research train\$.ti,ab. (103)  
 61 physician\$ scientist\$.ti,ab. (854)  
 62 surgeon\$ scientist\$.ti,ab. (165)  
 63 ((clinical or clinician\$) adj scientist\$.ti,ab. (1193)  
 64 ((clinical or clinician\$) adj scholar\$.ti,ab. (175)  
 65 ((clinical or clinician\$) adj researcher\$.ti,ab. (2597)  
 66 ((clinical or clinician\$) adj investigator\$.ti,ab. (1649)  
 67 ((clinical or clinician\$) adj educator\$.ti,ab. (1011)  
 68 or/54-67 (8891)  
 69 50 or 53 or 68 (30102)  
 70 (integrated adj3 academic adj3 (train\$ or career\$ or path or paths or pathway\$ or program\$)).ti,ab. (33)  
 71 (IAT adj2 (career\$ or path\$ or program\$)).ti,ab. (10)  
 72 Clinical Research Training Fellowship\$.ti,ab. (10)  
 73 Academic Foundation Program\$.ti,ab. (17)  
 74 (academi\$ adj3 (clinical or clinician\$ or medical or medicine or dental or dentistry) adj3 (career\$ or path or paths or pathway\$)).ti,ab. (383)  
 75 (research\$ adj3 (clinical or clinician\$ or medical or medicine or dental or dentistry) adj3 (career\$ or path or paths or pathway\$)).ti,ab. (330)  
 76 or/70-75 (751)  
 77 Career Choice/ (22485)  
 78 career mobility/ (11228)  
 79 Staff Development/ (9142)  
 80 (career\$ or pathway\$ or pipeline\$.ti,ab. (1105747)  
 81 ((occupation\$ or profession\$ or job\$ or staff or employee\$ or personnel) adj3 (choice\$ or choos\$ or select\$ or decid\$ or decision\$)).ti,ab. (7714)  
 82 ((occupation\$ or profession\$ or job\$ or staff or employee\$ or personnel) adj3 (mobility or ladder\$ or route\$ or trajector\$ or structure\$)).ti,ab. (2939)  
 83 ((occupation\$ or profession\$ or job\$ or staff or employee\$ or personnel) adj3 (progress\$ or promot\$ or develop\$ or advanc\$)).ti,ab. (26577)  
 84 or/77-83 (1166195)  
 85 69 and 84 (4314)  
 86 Personnel Selection/ (12625)  
 87 (recruit\$ or hire\$ or hiring).ti,ab. (355306)  
 88 86 or 87 (363489)  
 89 69 and 88 (1460)  
 90 Personnel Turnover/ (5027)  
 91 (retain\$ or retention).ti,ab. (350726)  
 92 (resign\$ or terminat\$ or disenroll\$ or withdraw\$ or attrition).ti,ab. (247203)  
 93 90 or 91 or 92 (595449)  
 94 69 and 93 (887)  
 95 85 or 89 or 94 (5724)  
 96 76 or 95 (6051)  
 97 exp animals/ not humans/ (4637358)  
 98 96 not 97 (6040)  
 99 limit 98 to english language (5741)  
 100 limit 99 to yr="2004 -Current" (4471)  
 101 (editorial or letter).pt. (1554107)  
 102 100 not 101 (4241) **[Records downloaded for search A – clinical academics AND career]**  
 103 69 or 76 (30413)  
 104 103 not 97 (30248)

105 limit 104 to english language (27498)  
106 limit 105 to yr="2004 -Current" (18930)  
107 106 not 101 (17714)  
108 107 not 102 (13473) **[Records downloaded for search B – clinical academics  
with search A results removed]**
