# Supplementary material
Source: HighWire-hosted journal article supplement (https://bmjopen.bmj.com/content/12/9/e060281)
Supplement: inline-supplementary-material-2 [file inline-supplementary-material-2.pdf]

## Appendix 2: Table of data for studies included in synthesis

| First author (Year of publication; country)   | Years of data collection | Study design                                  | Grade/type of clinical academics included                                                  | Number of participants (Male: Female)      | Ethnicity | Intervention components                                                                                                                                                                                                                                                                                        | Target population of intervention                 | Aimed at particular group | Reach         |
|-----------------------------------------------|--------------------------|-----------------------------------------------|--------------------------------------------------------------------------------------------|--------------------------------------------|-----------|----------------------------------------------------------------------------------------------------------------------------------------------------------------------------------------------------------------------------------------------------------------------------------------------------------------|---------------------------------------------------|---------------------------|---------------|
| Studies included within quantitative analysis |                          |                                               |                                                                                            |                                            |           |                                                                                                                                                                                                                                                                                                                |                                                   |                           |               |
| Brandt (2018; USA) <sup>19</sup>              | NR- NR                   | Cohort study. Concurrent & historical control | Orthopaedic surgery residents, academic level NR                                           | 329 (NR)                                   | NR        | Mentorship programme - junior mentee/senior mentor, Protected research time                                                                                                                                                                                                                                    | Trainees                                          | No                        | Single centre |
| Chang (2016; USA) <sup>21</sup>               | 1988-2009                | Cohort study. Concurrent control              | Clinically mixed group, post-training, range of academic levels                            | 65099, of which 3268 in intervention group | NR        | Leadership training. Faculty career development program, not described in detail for individual programs. EWIM & MWIM programs focus on academic skills development; ELAM is leadership training                                                                                                               | Junior Faculty, Managers/ leaders/ senior faculty | Gender                    | National      |
| Daley (2006; USA) <sup>22</sup>               | NR- 2005                 | Cohort study. Concurrent & historical control | Mixed group of faculty (medical, surgical, psychiatry, GP), mixed academic levels          | 112 (48:64)                                | 15 URM    | Mentorship programme - junior mentee/ senior mentor. Teaching sessions/ lectures, leadership training, faculty career development programme, networking/ collaboration/ social activities, academic performance counselling                                                                                    | Junior Faculty                                    | Ethnicity, URM            | Single centre |
| Dannels (2008; USA) <sup>23</sup>             | 2002-2006                | Cohort study. Concurrent control              | Post-training, post-doctoral. Speciality NR                                                | 250 (0:250)                                | NR        | Leadership training                                                                                                                                                                                                                                                                                            | Managers/ leaders/ senior faculty                 | Gender                    | Single centre |
| Ehlers (2018; USA) <sup>24</sup>              | 2018-2018                | Cohort study. Concurrent control              | Pre-doctoral fellows in cardiovascular diseases, gastroenterology and hepatology/ oncology | 140 (76:64)                                | NR        | Mentorship programme - junior mentee/ senior mentor. Teaching sessions/ lectures, protected research time. Teaching is focused on research training. E.g. research methods, protocol development, grant writing and manuscript writing, statistics and epidemiology. Also complete a mentored research project | Trainees, Junior Faculty                          | No                        | Single centre |
| Emans (2008; USA) <sup>25</sup>               | 2006- NR                 | Cohort study. Historical control              | Academic paediatric faculty. Academic level NR                                             | 238 (54%:46%)                              | NR        | Mentorship programme - junior mentee/ senior mentor. Teaching sessions/ lectures, leadership training, networking/ collaboration/ social activities, 'Community                                                                                                                                                | Junior Faculty                                    | Gender, Ethnicity         | Single centre |

| First author (Year of publication; country) | Years of data collection | Study design                                       | Grade/type of clinical academics included                      | Number of participants (Male: Female)                                              | Ethnicity                                                             | Intervention components                                                                                                                                                                                                                                                                                        | Target population of intervention | Aimed at particular group | Reach         |
|---------------------------------------------|--------------------------|----------------------------------------------------|----------------------------------------------------------------|------------------------------------------------------------------------------------|-----------------------------------------------------------------------|----------------------------------------------------------------------------------------------------------------------------------------------------------------------------------------------------------------------------------------------------------------------------------------------------------------|-----------------------------------|---------------------------|---------------|
|                                             |                          |                                                    |                                                                |                                                                                    |                                                                       | of mentors'. Work-life balance, cultural competency and diversity initiatives                                                                                                                                                                                                                                  |                                   |                           |               |
| Goldenberg (2012; USA) <sup>26</sup>        | NR- NR                   | Case control. Concurrent control                   | Trainees in academic haematology/ oncology. Academic level NR  | 20 (10 females)                                                                    | NR                                                                    | Mentorship programme - junior mentee/ senior mentor                                                                                                                                                                                                                                                            | Trainees                          | No                        | National      |
| Grisso (2017; USA) <sup>27</sup>            | 2010- NR                 | Multifaceted cluster randomised intervention trial | Assistant professors, speciality NR                            | 132 (0:132)                                                                        | 7.6% African American, 60.3% White, 27.5% Asian, 4.6% Hispanic/ other | Mentorship programme - junior mentee/ senior mentor. Mentorship programme - peers, grant writing programme, teaching sessions/ lectures, networking/ collaboration/ social activities, manuscript writing programme, also included a "Total Leadership Programme" which address work-life integration/ balance | Junior Faculty                    | Gender                    | Single centre |
| Harrison (2020; USA) <sup>29</sup>          | 2007- 2017               | Cohort study. Historical control                   | General surgery residents, academic level NR                   | 203 (NR)                                                                           | NR                                                                    | Mentorship programme - junior mentee/ senior mentor. Teaching sessions/ lectures, annual milestones, research meetings and feedback on completing research projects                                                                                                                                            | Trainees                          | No                        | Single centre |
| Joshua Smith (2014; USA) <sup>30</sup>      | NR-NR                    | Cohort study. Concurrent control                   | General surgery trainees. Academic level NR                    | 68 (NR)                                                                            | NR                                                                    | Research training; Protected research time                                                                                                                                                                                                                                                                     | Trainees                          | No                        | Single centre |
| Khot (2011; USA) <sup>31</sup>              | 2007- 2007               | Cohort study. Concurrent control                   | Post-training, post-doctoral. Speciality not reported          | 1577 NIH associates (4 female) who entered academic medicine; 27821 non-associates | NR                                                                    | Teaching sessions/ lectures, protected research time. Little detail reported                                                                                                                                                                                                                                   | Trainees                          | No                        | National      |
| Klimas (2017; Canada) <sup>45</sup>         | 2014- 2014               | Cohort study. Concurrent control                   | Trainees in internal medicine, family medicine, public health, | 8 (3:5)                                                                            | NR                                                                    | Mentorship programme - junior mentee/ senior mentor. Teaching sessions/ lectures                                                                                                                                                                                                                               | Trainees                          | No                        | National      |

| First author (Year of publication; country) | Years of data collection | Study design                     | Grade/type of clinical academics included                                                                 | Number of participants (Male: Female)         | Ethnicity                                                                | Intervention components                                                                                                                                                                                              | Target population of intervention | Aimed at particular group | Reach         |
|---------------------------------------------|--------------------------|----------------------------------|-----------------------------------------------------------------------------------------------------------|-----------------------------------------------|--------------------------------------------------------------------------|----------------------------------------------------------------------------------------------------------------------------------------------------------------------------------------------------------------------|-----------------------------------|---------------------------|---------------|
|                                             |                          |                                  | psychiatry, mix of academic levels                                                                        |                                               |                                                                          |                                                                                                                                                                                                                      |                                   |                           |               |
| Kohlwes (2006; USA) <sup>32</sup>           | 2001-2004                | Cohort study. Concurrent control | Trainees in internal medicine. Academic level NR                                                          | 32 (NR)                                       | NR                                                                       | Mentorship programme - junior mentee/senior mentor. Teaching sessions/ lectures, protected research time, small group journal clubs; work in progress sessions; conduct a clinical research project                  | Trainees                          | No                        | Single Centre |
| Kohlwes 2016; USA) <sup>33</sup>            | NR- NR                   | Cohort study. Concurrent control | Post-training in internal medicine. Academic level NR                                                     | 169 (88:81)                                   | 88 white, 1 black, 31 Asian Indian, 28 Asian Other, 12 Hispanic, 6 Other | Mentorship programme - junior mentee/ senior mentor. Teaching sessions/ lectures, protected research time, participants conduct research projects. Salary support provided for PRIME director and associate director | Trainees                          | No                        | Single Centre |
| Libby (2016; USA) <sup>34</sup>             | 2000-2011                | Cohort study. Concurrent control | Faculty from many disciplines of medicine/surgery as well as disciplines outside medicine. Post-doctoral  | 25 CFSP scholars; 125 comparison faculty (NR) | NR                                                                       | Mentorship programme - junior mentee/ senior mentor. Mentorship programme - peers, teaching sessions/ lectures, protected research time                                                                              | Junior Faculty                    | No                        | Single centre |
| Löwe (2008; Western Europe) <sup>48</sup>   | 2005-2006                | Cohort study. Concurrent control | Trainees from Internal Medicine, psychotherapy, psychosomatics, psychiatry, psychology. Academic level NR | 44 (17:27)                                    | NR                                                                       | Mentorship programme - junior mentee/ senior mentor. Teaching sessions/ lectures, teaching sessions held as part of a 'clinical research methods' course. Participants also conducted an individual research project | Trainees                          | No                        | Single centre |
| Mandel (2018; USA) <sup>35</sup>            | NR- NR                   | Cohort study. Historical control | Post-training plastic surgeons, academic level NR                                                         | 28 (24:4)                                     | NR                                                                       | Teaching sessions/lectures, protected research time. 1-2 year research fellowship, senior mentorship                                                                                                                 | Trainees                          | No                        | Single centre |
| Merani (2014; Canada) <sup>46</sup>         | 1988-2012                | Cohort study. Concurrent control | General surgery residents, mixed pre-doctoral and doctoral                                                | 323 (NR)                                      | NR                                                                       | Research training                                                                                                                                                                                                    | Trainees                          | No                        | National      |

| First author (Year of publication; country) | Years of data collection | Study design                     | Grade/type of clinical academics included                                           | Number of participants (Male: Female)                          | Ethnicity                                                     | Intervention components                                                                                                                                                                                                                                                                                                                                               | Target population of intervention | Aimed at particular group | Reach         |
|---------------------------------------------|--------------------------|----------------------------------|-------------------------------------------------------------------------------------|----------------------------------------------------------------|---------------------------------------------------------------|-----------------------------------------------------------------------------------------------------------------------------------------------------------------------------------------------------------------------------------------------------------------------------------------------------------------------------------------------------------------------|-----------------------------------|---------------------------|---------------|
| Mills (2011; USA) <sup>36</sup>             | Post 2007-NR             | Cohort study. Concurrent control | Paediatric residents and fellows, academic level NR                                 | 526 (197:297)                                                  | NR                                                            | Departmental research day at which paediatrics trainees present submitted research and other scholarly work                                                                                                                                                                                                                                                           | Trainees                          | No                        | Single centre |
| Nasab (2019; USA) <sup>37</sup>             | 2018-2018                | Cohort study. Concurrent control | Obstetricians & Gynecologists, trainees and post-training, range of academic levels | 109 attended, 94 pre-course survey, 74 post course survey (NR) | 63% white, 9% black, 5% Asian, 3% other, 20% did not disclose | Mentorship programme - junior mentee/ senior mentor. Teaching sessions/lectures, leadership training, networking/ collaboration/ social activities. Particular sessions included mock interviews, CV reviews, and grant writing support. 60-minute interactive sessions. Participants also given the opportunity to submit their grant proposals                      | Trainees, Junior Faculty          | No                        | Single Centre |
| Ockene (2017; USA) <sup>38</sup>            | NR- NR                   | Cohort study. Concurrent control | Post-doctoral, post-training, primary care physicians                               | 32 (11:21)                                                     | NR                                                            | Mentorship programme - junior mentee/ senior mentor. Mentorship programme – peers. Teaching sessions/ lectures, networking/ collaboration/ social activities                                                                                                                                                                                                          | Junior Faculty                    | No                        | Single centre |
| Patel (2018; USA) <sup>39</sup>             | 2011-2016                | Cohort study. Historical control | General surgery residents and faculty mentors. Mentors post-doctoral                | 67 (NR)                                                        | NR                                                            | Mentorship programme - junior mentee/ senior mentor. Teaching sessions/ lectures, protected research time, completion of a defined clinical research project. Other didactic activities included: active participation in the department's weekly clinical research meeting; attend lab meetings with faculty research mentor. Webinars on research and grant writing | Trainees                          | No                        | Single centre |
| Ries (2009; USA) <sup>40</sup>              | 1988-2006                | Cohort study. Concurrent control | Assistant professors in school of medicine. Speciality NR                           | 839 (520-319)                                                  | 52 URM                                                        | Mentorship programme - junior mentee/ senior mentor. Networking/ collaboration/ social activities, professional development workshops, performance counselling sessions                                                                                                                                                                                               | Junior Faculty                    | No                        | Single centre |
| Ries (2012; USA) <sup>41</sup>              | Post 2005-2006           | Case control. Concurrent control | Assistant professors from mixed specialities                                        | 315 (152:163)                                                  | 26 URM                                                        | Mentorship programme - junior mentee/ senior mentor. Networking/ collaboration/ social activities, faculty career development programme, Performance counselling sessions                                                                                                                                                                                             | Junior Faculty                    | No                        | Single centre |

| First author (Year of publication; country)        | Years of data collection | Study design                                   | Grade/type of clinical academics included                     | Number of participants (Male: Female)                    | Ethnicity | Intervention components                                                                                                                                                                                                                                                                                                                                                                                                    | Target population of intervention                 | Aimed at particular group                                                                                                                | Reach         |
|----------------------------------------------------|--------------------------|------------------------------------------------|---------------------------------------------------------------|----------------------------------------------------------|-----------|----------------------------------------------------------------------------------------------------------------------------------------------------------------------------------------------------------------------------------------------------------------------------------------------------------------------------------------------------------------------------------------------------------------------------|---------------------------------------------------|------------------------------------------------------------------------------------------------------------------------------------------|---------------|
| Sheridan (2010; USA) <sup>42</sup>                 | 2000-2008                | Cohort study. Concurrent control               | Post-training. Speciality NR. Academic level NR               | 163 (NR)                                                 | NR        | Recruitment training (e.g. to reduce bias in interviews)                                                                                                                                                                                                                                                                                                                                                                   | Junior Faculty, Managers/ leaders/ senior faculty | Gender, Ethnicity, "Individuals from any group that has been historically under-represented on the faculties of academic health centres" | Single centre |
| Sweeny (2019; Australia/New Zealand) <sup>47</sup> | 2015-2018                | Cohort study. Historical control               | Emergency Medicine, grade and academic level NR               | 33 Emergency departments (NR)                            | NR        | Networking/ collaboration/ social activities, research support                                                                                                                                                                                                                                                                                                                                                             | Clinical researchers in hospital departments      | No                                                                                                                                       | National      |
| Valantine (2014; USA) <sup>43</sup>                | 2011-2011                | Cohort study. Concurrent control               | Post-training, post-doctoral, speciality NR                   | Varying number of participants over several time periods | NR        | Mentorship programme - junior mentee/ senior mentor. Funding award, teaching sessions/ lectures, leadership training, protected research time, networking/ collaboration/ social activities, McCormick faculty awards. Faculty Fellows leadership program - individualised career development planning, skill building workshops, and the Women's faculty networking program. Intervention involved a series of programmes | Junior Faculty, Managers/ leaders/ senior faculty | Gender                                                                                                                                   | Single centre |
| Winn (2018; USA) <sup>44</sup>                     | 2013-2016                | Cohort study, case control. Historical control | Internal medicine and paediatrics trainees, academic level NR | 48 (NR)                                                  | NR        | Mentorship programme - junior mentee/senior mentor. Mentorship programme – peers. Teaching sessions/lectures, protected research time, "scholarly homes"                                                                                                                                                                                                                                                                   | Trainees                                          | No                                                                                                                                       | Single centre |
| Studies included within qualitative analysis       |                          |                                                |                                                               |                                                          |           |                                                                                                                                                                                                                                                                                                                                                                                                                            |                                                   |                                                                                                                                          |               |

| First author (Year of publication; country) | Years of data collection | Study design                                    | Grade/type of clinical academics included                                               | Number of participants (Male: Female) | Ethnicity                               | Intervention components                                                                                                                                                                                       | Target population of intervention                                                            | Aimed at particular group | Reach         |
|---------------------------------------------|--------------------------|-------------------------------------------------|-----------------------------------------------------------------------------------------|---------------------------------------|-----------------------------------------|---------------------------------------------------------------------------------------------------------------------------------------------------------------------------------------------------------------|----------------------------------------------------------------------------------------------|---------------------------|---------------|
| Archibald (2017; Canada) <sup>58</sup>      | 2013-2013                | Qualitative                                     | Physicians in family medicine, academic level NR                                        | 14 (NR)                               | NR                                      | Mentorship programme - junior mentee/ senior mentor. Funding award, protected research time. Assistants and coordinators provide resources and research support, networking/ collaboration/ social activities | All faculty staff                                                                            | No                        | Single centre |
| Caffrey (2016; UK) <sup>63</sup>            | 2015-2015                | Qualitative                                     | Medical school staff, grade NR, mixed academic levels                                   | 31 (NR)                               | NR                                      | Athena SWAN programme                                                                                                                                                                                         | Trainees, Junior Faculty, Managers/ leaders/ senior faculty, Relevant to whole of department | Gender                    | National      |
| Comeau (2017; USA) <sup>49</sup>            | 2007-2014                | Mixed methods. Quantitative work had no control | Trainees and post-training, mix of specialities, mix of academic levels                 | 46 (16:30)                            | 22 White, 24 Minority                   | Mentorship programme - junior mentee/ senior mentor. Funding award, teaching sessions/ lectures, protected research time                                                                                      | Junior Faculty                                                                               | No                        | National      |
| Darbyshire (2019; UK) <sup>64</sup>         | 2014-2014                | Mixed methods. Quantitative work had no control | AFP Trainees (survey) and post-training (interviews), mix of specialities, pre-doctoral | 34 survey; 7 interviews (NR)          | NR                                      | Research training programme; protected research time                                                                                                                                                          | Trainees                                                                                     | No                        | National      |
| *DeCastro (2013a; USA) <sup>50</sup>        | 2010-2011                | Qualitative                                     | Post-training, mix of specialities, mixed academic levels                               | 128 (52:76)                           | 99 White, 7 Black, 3 Hispanic, 18 Asian | Mentorship programme - junior mentee/senior mentor. Protected research time, funding award                                                                                                                    | Junior Faculty                                                                               | No                        | National      |
| *DeCastro (2013b; USA) <sup>51</sup>        | 2010-2011                | Qualitative                                     | Post-training, mix of specialities, mixed academic levels                               | 128 (52:76)                           | 99 White, 7 Black, 3 Hispanic, 18 Asian | Mentorship programme - junior mentee/senior mentor. Protected research time, funding award                                                                                                                    | Junior Faculty                                                                               | No                        | National      |

| First author (Year of publication; country) | Years of data collection | Study design                                                                                            | Grade/type of clinical academics included                                             | Number of participants (Male: Female)          | Ethnicity                                     | Intervention components                                                                                                                                                                                                                | Target population of intervention                 | Aimed at particular group                                                                                    | Reach         |
|---------------------------------------------|--------------------------|---------------------------------------------------------------------------------------------------------|---------------------------------------------------------------------------------------|------------------------------------------------|-----------------------------------------------|----------------------------------------------------------------------------------------------------------------------------------------------------------------------------------------------------------------------------------------|---------------------------------------------------|--------------------------------------------------------------------------------------------------------------|---------------|
| Hayward (2011; Canada) <sup>59</sup>        | 2008-2008                | Mixed methods. Quantitative work had no control                                                         | Trainees and post-training, mix of specialities, mix of academic levels               | 211 (survey); 13 (qualitative) (NR)            | NR                                            | Teaching sessions/ lectures, protected research time, mentorship programme - junior mentees/ senior mentors                                                                                                                            | Trainees                                          | No                                                                                                           | National      |
| Helitzer (2016; USA) <sup>52</sup>          | 2011- NR                 | Qualitative (Part of a larger mixed methods study but only qualitative findings reported in this paper) | Post-training, mix of specialities, mixed academic levels                             | 45 (0:45)                                      | NR                                            | Not described in detail for the three programmes separately. EWIM & MWIM held over three days and involved skills and confidence building. ELAM programme was leadership training. All three are faculty career development programmes | Junior Faculty, Managers/ leaders/ senior faculty | Gender                                                                                                       | National      |
| Iversen (2014; UK) <sup>65</sup>            | 2010-2010                | Mixed methods. Quantitative work had no control                                                         | Post-training, mix of specialities, academic level unclear                            | 147 mentees (67% male) & 77 mentors (81% male) | NR                                            | Mentorship programme - junior mentee/ senior mentor                                                                                                                                                                                    | Junior Faculty                                    | No                                                                                                           | National      |
| Jones (2019; USA) <sup>53</sup>             | 2018-2018                | Qualitative study                                                                                       | Early-career or junior physician-scientists, range of specialities, academic level NR | 28 (5:23)                                      | 11 Non-Hispanic white; 7 Asian; 7 Other; 3 NR | Funding award. Some institutions have also provided access to other forms of support, such as leadership development training, training in academic and career development skills, and/or networking.                                  | Junior Faculty                                    | No, but 85% of awardees are women and tailored more towards those with extra-professional caregiving demands | National      |
| *Klimas (2017a; Canada) <sup>60</sup>       | 2015-2015                | Qualitative                                                                                             | Fellowship in addiction medicine. Trainees from Psychiatry,                           | 26 (12:14)                                     | NR                                            | Mentorship programme - junior mentee/ senior mentor. Funding award, teaching sessions/ lectures, specialty training                                                                                                                    | Trainees                                          | No                                                                                                           | Single centre |

| First author (Year of publication; country) | Years of data collection | Study design                                    | Grade/type of clinical academics included                                                                                                | Number of participants (Male: Female) | Ethnicity                                           | Intervention components                                                                                                                                                      | Target population of intervention                 | Aimed at particular group               | Reach         |
|---------------------------------------------|--------------------------|-------------------------------------------------|------------------------------------------------------------------------------------------------------------------------------------------|---------------------------------------|-----------------------------------------------------|------------------------------------------------------------------------------------------------------------------------------------------------------------------------------|---------------------------------------------------|-----------------------------------------|---------------|
|                                             |                          |                                                 | Internal Medicine, Family Medicine, Nursing & Social Work. Academic level NR                                                             |                                       |                                                     |                                                                                                                                                                              |                                                   |                                         |               |
| *Klimas (2017b; Canada) <sup>61</sup>       | 2015-2015                | Qualitative                                     | Fellowship in addiction medicine. Trainees from Psychiatry, Internal Medicine, Family Medicine, Nursing & Social Work. Academic level NR | 26 (12:14)                            | NR                                                  | Mentorship programme - junior mentee/ senior mentor. Funding award, teaching sessions/ lectures, specialty training                                                          | Trainees                                          | No                                      | Single centre |
| Kraemer (2018; USA) <sup>54</sup>           | 2014-2016                | Mixed methods. Quantitative work had no control | Residents and fellows in medical specialities. Academic level NR                                                                         | 69 (41 residents, 28 fellows)         | NR                                                  | Teaching sessions/ lectures. Faculty career development programme                                                                                                            | Trainees                                          | No                                      | Single centre |
| Lin (2019; USA) <sup>55</sup>               | Post 2009- NR            | Qualitative                                     | Post-training, post-doctoral, emergency medicine                                                                                         | 17 (0:17)                             | 12 Caucasian; 4 Asian American; 1 African American. | Mentorship programme - junior mentee/ senior mentor. Networking/ collaboration/ social activities, skill enhancement, e.g. negotiating skills                                | Junior Faculty, Managers/ leaders/ senior faculty | Gender                                  | National      |
| Moss (2008; Canada) <sup>62</sup>           | 2005-2005                | Qualitative                                     | Lecturers and assistant professors in Psychiatry                                                                                         | 10 (6:4)                              | NR                                                  | Mentorship programme - peers                                                                                                                                                 | Junior Faculty                                    | No                                      | Single centre |
| Reader (2015; USA) <sup>56</sup>            | 2009-2009                | Mixed methods. Quantitative work had no control | Post-training, speciality NR, mix of academic levels                                                                                     | 10 (2:8)                              | NR                                                  | Mentorship programme - junior mentee/ senior mentor. Mentorship programme – peer. Teaching sessions/ lectures, protected research time. Faculty career development programme | Junior Faculty, Managers/ leaders/ senior faculty | Designed for “busy clinician educators” | Single centre |



| First author (Year of publication; country)                        | Years of data collection | Study design                                            | Grade/type of clinical academics included                                   | Number of participants (Male: Female)                              | Ethnicity                                                  | Intervention components                                                                                                          | Target population of intervention | Aimed at particular group | Reach         |
|--------------------------------------------------------------------|--------------------------|---------------------------------------------------------|-----------------------------------------------------------------------------|--------------------------------------------------------------------|------------------------------------------------------------|----------------------------------------------------------------------------------------------------------------------------------|-----------------------------------|---------------------------|---------------|
| Stubbe (2008; USA) <sup>57</sup>                                   | NR- NR                   | Qualitative                                             | Academic Child and Adolescent Psychiatry Residents. Academic level NR       | 5 (NR)                                                             | NR                                                         | Mentorship programme - junior mentee/ senior mentor, Teaching sessions/ lectures, Protected research time                        | Trainees                          | No                        | Single centre |
| Studies included within both quantitative and qualitative analysis |                          |                                                         |                                                                             |                                                                    |                                                            |                                                                                                                                  |                                   |                           |               |
| Campion (2016; USA) <sup>20</sup>                                  | 2014- 2014               | Mixed methods. Quantitative work had concurrent control | Post-doctoral, clinical faculty and school of public health faculty         | 16 in intervention group (>60% women) 25 people in reference group | 30% URM                                                    | Mentorship programme – peers. Teaching sessions/ lectures, protected research time, networking/ collaboration/ social activities | Junior faculty                    | No                        | Single centre |
| Guevara (2018; USA) <sup>28</sup>                                  | NR- NR                   | Mixed methods. Quantitative work had concurrent control | Medical residents, junior staff and assistant profs. Academic level unclear | 124 (65:59)                                                        | 91 African American, 29 Hispanic Latino, 4 Native American | Funding award                                                                                                                    | Trainees, Junior Faculty          | Ethnicity, URM            | National      |

\* Both papers by DeCastro et al.<sup>50 51</sup> and Klimas et al.<sup>60 61</sup> were based on data collected from a single sample of respondents.

Abbreviations: AFP – Academic Foundation Programme; CFSP – Clinical Faculty Scholars Program; CV – Curriculum Vitae; ELAM – Executive Leadership in Academic Medicine programme; EWIM – Early-career Women In Medicine program; GP – General Practitioner; MWIM – Mid-career Women In Medicine program; NR – Not reported; PRIME – Primary Medical Education program; RCT – Randomised control trial; UK – United Kingdom; URM – Underrepresented minority (study defined); USA – United States of America
