# Supplementary material
Source: HighWire-hosted journal article supplement (https://bmjopen.bmj.com/content/12/9/e060281)
Supplement: inline-supplementary-material-3 [file inline-supplementary-material-3.pdf]

## Appendix 3: Quality assessment details

### *Randomised control trial*

The single eligible randomised control trial had a low risk of bias for random sequence generation, blinding of outcome assessment, and incomplete outcome data items.<sup>27</sup> Participant blinding showed a high risk of bias as participants knew which groups they were assigned to. A risk of recruitment bias was also evident due to the cluster-randomised design. Allocation concealment and selective outcome reporting were unclear.<sup>27</sup>

### *Case-control studies*

One of the two identified case-control study was rated medium to high quality for all items.<sup>41</sup> The other case-control study was of lower overall quality as it demonstrated a high risk of selection bias for intervention participant selection, and no methodological or analytical adjustments were made for comparing intervention and control groups.<sup>26</sup>

### *Cohort studies*

The majority of the 25 included cohort studies had representative intervention populations,<sup>19 21 22 24 25 29-35 37-40 43 44 46-48</sup> appropriate control groups,<sup>19 21-25 29 30 32-40 42 44-47</sup> high quality outcome assessment methods,<sup>19 21 24 29-31 34 36-38 40 45-47</sup> and long follow-up periods.<sup>19 21-25 29-32 34-36 38-40 42-44 46 47</sup> However, comparability was mostly deemed poor as groups were often unmatched.<sup>19 22 25 29 31 32 35 37-39 42 45-47</sup> Only one study demonstrated high quality on all items,<sup>24</sup> whilst two studies scored positively on eight out of nine items, but failed to provide cohort follow-up information.<sup>21 40</sup> There were additional identified risks in group selection as several studies incorporated pre-selected or highly motivated populations for intervention groups (for example, Dannels et al.<sup>23</sup>).

### *Qualitative methodology studies*

The majority of qualitative studies were of high quality for demonstrating congruity between the research methodology used and the: i) research question,<sup>49-56 58-62 64</sup> ii) data collection methods,<sup>49-56 58-61 64 65</sup> iii) data analysis and presentation,<sup>49-56 58 60 61 64</sup> and iv) interpretation of results.<sup>49-56 58-62 64 65</sup> However, inadequate reporting of important information was frequent with studies failing to provide statements relating to the relationship between the researchers and research itself.<sup>49 52 54-61 64 65</sup> Only one study demonstrated high quality on all items of the quality assessment tool.<sup>53</sup>

### *Realist evaluation*

The realist evaluation study was rated medium to high quality on the majority of the criteria.<sup>63</sup> Only three aspects of the evaluation were deemed inadequate, which all related to incomplete methodological reporting, especially surrounding data analysis.<sup>63</sup>

### *Mixed methods studies*

The two controlled mixed methods studies were deemed high quality on the majority of criteria.<sup>20 28</sup> Notably, Campion et al.,<sup>20</sup> demonstrated a lack of reporting for complete outcome data and failed to provide high quality methodological approaches for both the qualitative and quantitative components of the study. Guevara et al.,<sup>28</sup> failed to provide a rationale for using a mixed methods design. Finally, it was unclear whether the intervention was conducted as intended in both studies.<sup>20 28</sup>
