# Supplementary material
Source: HighWire-hosted journal article supplement (https://bmjopen.bmj.com/content/12/9/e060281)
Supplement: inline-supplementary-material-4 [file inline-supplementary-material-4.pdf]

Appendix 4: Table of outcome data for studies within quantitative analysis

| First author (Year of publication) | Intervention group*       | Control group*                                                                                                                     | Outcome                                                                                                                        | Sample size: intervention group | Sample size: control group | Estimate (95% CI/ p value/ SD)                                           | Estimate adjusted for                                                                                                                                                                                                                                                  |
|------------------------------------|---------------------------|------------------------------------------------------------------------------------------------------------------------------------|--------------------------------------------------------------------------------------------------------------------------------|---------------------------------|----------------------------|--------------------------------------------------------------------------|------------------------------------------------------------------------------------------------------------------------------------------------------------------------------------------------------------------------------------------------------------------------|
| <b>Aspiration</b>                  |                           |                                                                                                                                    |                                                                                                                                |                                 |                            |                                                                          |                                                                                                                                                                                                                                                                        |
| Dannels (2008) <sup>23</sup>       | Programme participants    | Two control groups: Applied but not accepted non-programme participants & general mid-career faculty women (also non-participants) | Aspiration to higher leadership position within an academic health centre (academic medicine)                                  | 55                              | 27 & 178                   | 76.4% vs 63.0% vs 49.4% (chi-squared= 12.903, p=0.002)                   | Unadjusted but faculty control group matched on academic rank, department chair status, race/ethnicity, discipline, degree type, basic sciences vs clinical department, age, medical school ownership, and awards ranking.                                             |
| <b>Career Satisfaction</b>         |                           |                                                                                                                                    |                                                                                                                                |                                 |                            |                                                                          |                                                                                                                                                                                                                                                                        |
| Campion (2016) <sup>20</sup>       | Intervention participants | Reference group (non-participants)                                                                                                 | Career satisfaction post-intervention                                                                                          | 10                              | 12                         | N=9 satisfied or very satisfied vs N=12 satisfied or very satisfied (NR) | Unadjusted                                                                                                                                                                                                                                                             |
| Grisso (2017) <sup>27</sup>        | Intervention group        | Control group (no intervention)                                                                                                    | Work self-efficacy change scores                                                                                               | 62                              | 70                         | 0.18 vs 0.24 (p=0.642)                                                   | Statistical tests were adjusted to account for correlation induced by the clustered design using generalized estimating equations. Both within-person factors (age, years in rank, race) and unit-level factors (intervention assignment) were modelled simultaneously |
|                                    | Intervention group        | Control group (no intervention)                                                                                                    | Work-family conflict change (TWIF scores)                                                                                      | 62                              | 70                         | -0.13 vs -0.05 (p=0.541)                                                 |                                                                                                                                                                                                                                                                        |
|                                    | Intervention group        | Control group (no intervention)                                                                                                    | Work-family conflict change (SWIF scores)                                                                                      | 62                              | 70                         | -0.20 vs -0.23 (p=0.879)                                                 |                                                                                                                                                                                                                                                                        |
|                                    | Intervention group        | Control group (no intervention)                                                                                                    | CCWAS culture score change                                                                                                     | Unclear; 109 in total           | Unclear; 109 in total      | 0.03 vs 0.13 (p=0.274)                                                   |                                                                                                                                                                                                                                                                        |
| Winn (2018) <sup>44</sup>          | Academy participants      | Pre-academy participants                                                                                                           | Percentage of people who felt that the BCRP have been quite or extremely supportive in helping people to make career decisions | 24                              | 22                         | 63% vs 45% (p=0.37)                                                      | Unadjusted                                                                                                                                                                                                                                                             |
|                                    | Academy participants      | Pre-academy participants                                                                                                           | Percentage of people who agree or strongly                                                                                     | 25                              | 22                         | 76% vs 63% (p=0.54)                                                      |                                                                                                                                                                                                                                                                        |

| First author (Year of publication) | Intervention group*         | Control group*                                   | Outcome                                                                                         | Sample size: intervention group | Sample size: control group | Estimate (95% CI/ p value/ SD)                                                                                            | Estimate adjusted for |
|------------------------------------|-----------------------------|--------------------------------------------------|-------------------------------------------------------------------------------------------------|---------------------------------|----------------------------|---------------------------------------------------------------------------------------------------------------------------|-----------------------|
|                                    |                             |                                                  | agree that the BCRP guides and supports residents in pursuing and presenting scholarly projects |                                 |                            |                                                                                                                           |                       |
| <b>Skills &amp; Knowledge</b>      |                             |                                                  |                                                                                                 |                                 |                            |                                                                                                                           |                       |
| Campion (2016) <sup>20</sup>       | Intervention participants   | Reference group (non-participants)               | Knowledge, Skills, and Attitudes Survey                                                         | 9                               | 11                         | No overall estimate. For 13 out of 32 items on the scale, participants showed greater gains than the reference group (NR) | Unadjusted            |
|                                    | Intervention participants   | Reference group (non-participants)               | Change in Sense of Community Index score (SCI-2 total score)                                    | 10                              | 12                         | Mean change 10.6 vs 3.83 (p=0.2, SD=13.7 vs 9.40)                                                                         |                       |
| Kohlwes (2006) <sup>32</sup>       | Programme residents (PRIME) | Non-PRIME programme residents                    | Clinical competence score (average on a 9 point scale)                                          | 32                              | 2294                       | 8.23 vs 8.09 (p<0.001)                                                                                                    | Unadjusted            |
| Löwe (2008) <sup>48</sup>          | Intervention residents      | Control residents (from two different locations) | Mean change in total methodological research knowledge score from baseline                      | 15                              | 22                         | 8.4 vs 1.2 (effect size =2.5, p<0.001, SD=2.9 vs 2.8)                                                                     | Unadjusted            |
|                                    | Intervention residents      | Control residents (from two different locations) | Mean change in total self-assessment research competence score from baseline                    | 15                              | 22                         | 0.4 vs -0.4 (effect size=1.1, p=0.01, SD=0.9 vs 0.7)                                                                      |                       |

| First author (Year of publication) | Intervention group*  | Control group*                  | Outcome                                                                                                                         | Sample size: intervention group | Sample size: control group | Estimate (95% CI/ p value/ SD)              | Estimate adjusted for                                                                                                              |
|------------------------------------|----------------------|---------------------------------|---------------------------------------------------------------------------------------------------------------------------------|---------------------------------|----------------------------|---------------------------------------------|------------------------------------------------------------------------------------------------------------------------------------|
| Winn (2018) <sup>44</sup>          | Academy participants | Pre-academy participants        | Percentage of people who agree or strongly agree that they have learned how to present a poster through BCRP activities         | 24                              | 22                         | 50% vs 29% (p=0.07)                         | Unadjusted                                                                                                                         |
|                                    | Academy participants | Pre-academy participants        | Percentage of people who agree or strongly agree that they have learned how to give a presentation/talk through BCRP activities | 24                              | 22                         | 75% vs 36% (p=0.02)                         |                                                                                                                                    |
|                                    | Academy participants | Pre-academy participants        | Percentage of people who agree or strongly agree with feeling prepared for non-clinical (scholarly) work after residency        | 24                              | 22                         | 63% vs 45% (p=0.37)                         |                                                                                                                                    |
| <b>Funding</b>                     |                      |                                 |                                                                                                                                 |                                 |                            |                                             |                                                                                                                                    |
| Goldenberg (2012) <sup>26</sup>    | Programme trainees   | Non-programme trainees          | Annual grant dollars received (excluding fellowship award funding) at 3-4 years post-fellowship                                 | 11                              | 9                          | Median \$80,000 vs \$23,000 (p=0.2)         | Unadjusted                                                                                                                         |
|                                    | Programme trainees   | Non-programme trainees          | Percentage of individuals who obtained K award within 5 years of beginning fellowship                                           | 9                               | 8                          | 33% vs 0% (p=0.21)                          |                                                                                                                                    |
| Grisso (2017) <sup>27</sup>        | Intervention group   | Control group (no intervention) | Percentage of individuals with improved grants                                                                                  | 62                              | 70                         | Rate Ratio 0.75 (95% CI: 0.54-1.03, p=0.08) | Statistical tests were adjusted to account for correlation induced by the clustered design using generalized estimating equations. |

| First author (Year of publication) | Intervention group*                           | Control group*                                                      | Outcome                                                                                         | Sample size: intervention group | Sample size: control group | Estimate (95% CI/ p value/ SD)                         | Estimate adjusted for                                                                                                               |
|------------------------------------|-----------------------------------------------|---------------------------------------------------------------------|-------------------------------------------------------------------------------------------------|---------------------------------|----------------------------|--------------------------------------------------------|-------------------------------------------------------------------------------------------------------------------------------------|
|                                    |                                               |                                                                     |                                                                                                 |                                 |                            |                                                        | Both within-person factors (age, years in rank, race) and unit-level factors (intervention assignment) were modelled simultaneously |
| Guevara (2018) <sup>28</sup>       | Interview applications scholars               | Interview applications non-scholars                                 | Total number of grants (mean)                                                                   | 76                              | 48                         | 2.0 vs 0.7 (p<0.001, SD=1.5 vs 1.0)                    | Adjusted for age, gender, race/ethnicity, application year, change of institutions, and rank at time of application                 |
|                                    | Interview applications scholars               | Interview applications non-scholars                                 | Total grant dollars in thousands (mean)                                                         | 76                              | 48                         | \$1,463 vs \$567 (p=0.02, SD=\$2,390 vs \$1,507)       |                                                                                                                                     |
| Libby (2016) <sup>34</sup>         | Programme participants (assistant professors) | Matched controls (non-programme participants, assistant professors) | Number of grant awards - change in mean before and after intervention                           | 25                              | 125                        | 0.20 to 1.15 vs 0.30 to 0.49 (p<0.01)                  | Unadjusted but controls matched for key variables such as time in rank and dollars awarded                                          |
|                                    | Programme participants (assistant professors) | Matched controls (non-programme participants, assistant professors) | Amount of funding associated with grant awards - change in mean before and after intervention   | 25                              | 125                        | \$21,580 to \$105,008 vs \$26,742 to \$53,716 (p<0.01) |                                                                                                                                     |
|                                    | Programme participants (assistant professors) | Matched controls (non-programme participants, assistant professors) | Percentage grant success rate (no. awards/no. proposals) - change before and after intervention | 25                              | 125                        | 46.9% to 52.9% vs 42.5% to 51.7% (p=0.78)              |                                                                                                                                     |
| Löwe (2008) <sup>48</sup>          | Intervention residents                        | Control residents (from two different locations)                    | Percentage of people who had grant applications accepted for funding                            | 15                              | 22                         | 33% vs 0% (p=0.007)                                    | Unadjusted                                                                                                                          |
| Sweeny (2019) <sup>47</sup>        | After programme implementation participants   | Before programme implementation participants                        | Number of grants awarded to new investigators                                                   | NR                              | NR                         | 30 vs 20 (NR)                                          | Unadjusted                                                                                                                          |

| First author (Year of publication) | Intervention group*                            | Control group*                                  | Outcome                                                                               | Sample size: intervention group | Sample size: control group | Estimate (95% CI/ p value/ SD)              | Estimate adjusted for                                                                                                                                                                                                                                                  |
|------------------------------------|------------------------------------------------|-------------------------------------------------|---------------------------------------------------------------------------------------|---------------------------------|----------------------------|---------------------------------------------|------------------------------------------------------------------------------------------------------------------------------------------------------------------------------------------------------------------------------------------------------------------------|
| <b>Research Participation</b>      |                                                |                                                 |                                                                                       |                                 |                            |                                             |                                                                                                                                                                                                                                                                        |
| Brandt (2018) <sup>19</sup>        | Research residents                             | Clinical residents                              | Percentage of participants actively engaged in research after intervention completion | 43                              | 284                        | 42% vs 29% (p=0.04)                         | Unadjusted                                                                                                                                                                                                                                                             |
| Goldenberg (2012) <sup>26</sup>    | Programme trainees                             | Non-programme trainees                          | Percentage of time spent in research post-fellowship                                  | 11                              | 9                          | Median 80% vs 55% (p=0.01)                  | Unadjusted                                                                                                                                                                                                                                                             |
| Grisso (2017) <sup>27</sup>        | Intervention group                             | Control group (no intervention)                 | Change in the number of total hours worked per week                                   | 62                              | 70                         | -3.82 vs -1.39 (p=0.006)                    | Statistical tests were adjusted to account for correlation induced by the clustered design using generalized estimating equations. Both within-person factors (age, years in rank, race) and unit-level factors (intervention assignment) were modelled simultaneously |
| Harrison (2020) <sup>29</sup>      | Participants after intervention implementation | Participants before intervention implementation | Total number of presentations (mean) - <i>just residents</i>                          | Unclear                         | Unclear                    | 24.6 vs 3.0 (p=0.002, SD=10.24 vs 1.58)     | Unadjusted                                                                                                                                                                                                                                                             |
|                                    | Participants after intervention implementation | Participants before intervention implementation | Grant submissions (mean) - <i>just residents</i>                                      | Unclear                         | Unclear                    | 0.8 vs 0.0 (NR)                             |                                                                                                                                                                                                                                                                        |
|                                    | Participants after intervention implementation | Participants before intervention implementation | Total number of presentations (mean) - <i>just faculty</i>                            | Unclear                         | Unclear                    | 40.0 vs 8.2 (p=0.025, SD=20.51 vs 1.30)     | Unadjusted                                                                                                                                                                                                                                                             |
| Kohlwes (2016) <sup>33</sup>       | Programme residents (PRIME)                    | Non-PRIME programme residents                   | Percentage of alumni who identified their primary role as a clinician investigator    | 71                              | 98                         | 35.2% vs 28.6% (chi-squared=0.843, p=0.358) | Unadjusted                                                                                                                                                                                                                                                             |
|                                    | Programme residents (PRIME)                    | Non-PRIME programme residents                   | Mean percentage of professional time devoted                                          | 71                              | 98                         | 26.2% vs 20.6% (p=0.255)                    |                                                                                                                                                                                                                                                                        |

| First author (Year of publication) | Intervention group*                            | Control group*                                   | Outcome                                                                                                | Sample size: intervention group | Sample size: control group | Estimate (95% CI/ p value/ SD) | Estimate adjusted for |
|------------------------------------|------------------------------------------------|--------------------------------------------------|--------------------------------------------------------------------------------------------------------|---------------------------------|----------------------------|--------------------------------|-----------------------|
|                                    |                                                |                                                  | to clinical or translational research                                                                  |                                 |                            |                                |                       |
| Löwe (2008) <sup>48</sup>          | Intervention residents                         | Control residents (from two different locations) | Percentage of people currently writing a journal article during 1 year program                         | 15                              | 22                         | 86.7% vs 36.4% (p=0.003)       | Unadjusted            |
|                                    | Intervention residents                         | Control residents (from two different locations) | Percentage of people currently writing a book article during 1 year program                            | 15                              | 22                         | 6.7% vs 13.6% (p=0.63)         |                       |
|                                    | Intervention residents                         | Control residents (from two different locations) | Percentage of people who did presentations at scientific meetings during the last year                 | 15                              | 22                         | 80% vs 40.9% (p=0.04)          |                       |
|                                    | Intervention residents                         | Control residents (from two different locations) | Percentage of people who submitted one or more grant proposal with first authorship in the last year   | 15                              | 22                         | 6.7% vs 0% (p=0.41)            |                       |
|                                    | Intervention residents                         | Control residents (from two different locations) | Percentage of people who submitted one or more grant proposal with co-authorship in the last year      | 15                              | 22                         | 46.7% vs 4.6% (p=0.004)        |                       |
| **Mandel (2018) <sup>35</sup>      | Graduates after residency programme transition | Graduates before residency programme transition  | Percentage of graduates whose research activities were dedicated to clinical research during residency | 19                              | 9                          | 84% vs 33% (p=0.013)           | Unadjusted            |
|                                    | Graduates after residency programme transition | Graduates before residency programme transition  | Percentage of graduates whose research activities were dedicated to full time basic                    | 19                              | 9                          | 33% vs 22% (p=0.68)            |                       |

| First author<br>(Year of<br>publication) | Intervention<br>group*                                                        | Control group*                                        | Outcome                                                                                 | Sample size:<br>intervention<br>group | Sample size:<br>control group | Estimate (95% CI/<br>p value/ SD)                  | Estimate adjusted for                                                                                    |
|------------------------------------------|-------------------------------------------------------------------------------|-------------------------------------------------------|-----------------------------------------------------------------------------------------|---------------------------------------|-------------------------------|----------------------------------------------------|----------------------------------------------------------------------------------------------------------|
|                                          |                                                                               |                                                       | science/translational<br>research during residency                                      |                                       |                               |                                                    |                                                                                                          |
|                                          | Graduates after<br>residency<br>programme<br>transition                       | Graduates before<br>residency programme<br>transition | Percentage of graduates<br>whose current practice<br>included clinical research         | 19                                    | 9                             | 79% vs 0%<br>(p<0.001)                             |                                                                                                          |
|                                          | Graduates after<br>residency<br>programme<br>transition                       | Graduates before<br>residency programme<br>transition | Percentage of graduates<br>whose current practice<br>included laboratory<br>research    | 19                                    | 9                             | 5% vs 0% (p=1)                                     |                                                                                                          |
|                                          | Graduates after<br>residency<br>programme<br>transition                       | Graduates before<br>residency programme<br>transition | Percentage of graduates<br>whose current practice<br>included academic<br>practice      | 19                                    | 9                             | 44% vs 0%<br>(p=0.026)                             |                                                                                                          |
| Sweeny (2019) <sup>47</sup>              | After programme<br>implementation<br>participants                             | Before programme<br>implementation<br>participants    | Number of research<br>active emergency<br>healthcare providers                          | NR                                    | NR                            | 181 vs 23 (NR)                                     | Unadjusted                                                                                               |
|                                          | After programme<br>implementation<br>participants                             | Before programme<br>implementation<br>participants    | Number of presentations<br>by emergency clinicians                                      | NR                                    | NR                            | 61 vs 6 (NR)                                       |                                                                                                          |
| <b>Retention &amp; Promotion</b>         |                                                                               |                                                       |                                                                                         |                                       |                               |                                                    |                                                                                                          |
| Chang (2016) <sup>21</sup>               | Attendants from 1<br>of 3 career<br>development<br>programmes (all<br>female) | Matched non-<br>participants (all female)             | Retention as assistant<br>professor role (since first<br>year of appointment)           | 732                                   | 4962                          | Log rank chi-<br>squared 640.95,<br>df=1 (p<0.001) | Adjusted for years in academic<br>medicine, age, tenure track<br>status, degree type, department<br>type |
|                                          | Attendants from 1<br>of 3 career<br>development<br>programmes (all<br>female) | Matched non-<br>participants (all female)             | Likelihood of departure<br>from academic medicine -<br><i>just assistant professors</i> | Unclear                               | Unclear                       | HR 0.85 (95% CI:<br>0.74-0.98)                     |                                                                                                          |

| First author (Year of publication) | Intervention group*                                               | Control group*                        | Outcome                                                                            | Sample size: intervention group | Sample size: control group | Estimate (95% CI/ p value/ SD)                                                                                     | Estimate adjusted for |
|------------------------------------|-------------------------------------------------------------------|---------------------------------------|------------------------------------------------------------------------------------|---------------------------------|----------------------------|--------------------------------------------------------------------------------------------------------------------|-----------------------|
|                                    | Attendants from 1 of 3 career development programmes (all female) | Matched non-participants (all female) | Likelihood of departure from academic medicine - <i>just associate professors</i>  | Unclear                         | Unclear                    | HR 0.76 (95% CI: 0.64-0.93)                                                                                        |                       |
|                                    | Attendants from 1 of 3 career development programmes (all female) | Matched non-participants (all female) | Likelihood of departure from academic medicine - <i>just full professors</i>       | Unclear                         | Unclear                    | HR 0.68 (95% CI: 0.50-0.92)                                                                                        |                       |
|                                    | Attendants from 1 of 3 career development programmes (all female) | Matched non-participants (all female) | Departure from academic medicine after 10 years - <i>just assistant professors</i> | 732                             | 4962                       | 20% vs 33% (NR)                                                                                                    |                       |
|                                    | Attendants from 1 of 3 career development programmes (all female) | Matched non-participants (all female) | Departure from academic medicine after 10 years - <i>just associate professors</i> | 429                             | 884                        | 10% vs 17% (NR)                                                                                                    |                       |
|                                    | Attendants from 1 of 3 career development programmes (all female) | Matched non-participants (all female) | Departure from academic medicine after 10 years - <i>just full professors</i>      | 215                             | 172                        | 8% vs 17% (NR)                                                                                                     |                       |
|                                    | Attendants from 1 of 3 career development programmes (all female) | Matched non-participants (all female) | Long term retention in academic medicine - <i>just assistant professors</i>        | 732                             | 4962                       | Intervention participants were less likely to leave academia in the periods 0-13 years after their appointment and |                       |



| First author (Year of publication) | Intervention group*                                               | Control group*                                                       | Outcome                                                                     | Sample size: intervention group | Sample size: control group | Estimate (95% CI/ p value/ SD)                                                                                      | Estimate adjusted for                                                                                                                                                                                                                                                         |
|------------------------------------|-------------------------------------------------------------------|----------------------------------------------------------------------|-----------------------------------------------------------------------------|---------------------------------|----------------------------|---------------------------------------------------------------------------------------------------------------------|-------------------------------------------------------------------------------------------------------------------------------------------------------------------------------------------------------------------------------------------------------------------------------|
|                                    |                                                                   |                                                                      |                                                                             |                                 |                            | 22 years after or longer (NR).                                                                                      |                                                                                                                                                                                                                                                                               |
|                                    | Attendants from 1 of 3 career development programmes (all female) | Matched non-participants (all female)                                | Long term retention in academic medicine - <i>just associate professors</i> | 429                             | 884                        | Intervention participants were less likely to leave academia in the periods 0-10 years after their appointment (NR) |                                                                                                                                                                                                                                                                               |
|                                    | Attendants from 1 of 3 career development programmes (all female) | Matched non-participants (all female)                                | Long term retention in academic medicine - <i>just full professors</i>      | 215                             | 172                        | Intervention participants were less likely to leave academia in any period after their initial appointment (NR)     |                                                                                                                                                                                                                                                                               |
| Daley (2006) <sup>22</sup>         | Junior faculty after implementation - intervention participants   | Junior faculty before implementation - non-intervention participants | Percentage of URM junior staff retained at the faculty                      | 15                              | 12                         | 87% vs 58% (z statistic=1.69, p=0.091)                                                                              | Unadjusted                                                                                                                                                                                                                                                                    |
|                                    | Junior faculty after implementation - intervention participants   | Junior faculty before implementation - non-intervention participants | Percentage of URM junior staff retained in academic medicine                | 15                              | 12                         | 93% vs 75% (z statistic=1.33, p=0.184)                                                                              |                                                                                                                                                                                                                                                                               |
| Ehlers (2018) <sup>24</sup>        | Programme participants                                            | Matched non-programme participants                                   | Enter private practice post-programme                                       | 70                              | 70                         | 40% vs 38.6% (p=0.862)                                                                                              | Time since matriculation into fellowship was included as a covariate. Matching criteria included fellowship program (CV or GI), gender, years of post-MD graduate training ( $\pm 1$ year for 65 pairs and $\pm 3$ years for 5 pairs), age at the time of starting fellowship |
|                                    | Programme participants                                            | Matched non-programme participants                                   | Enter academic practice post-programme                                      | 70                              | 70                         | 60% vs 61.4% (p=0.862)                                                                                              |                                                                                                                                                                                                                                                                               |

| First author (Year of publication) | Intervention group*                  | Control group*                                            | Outcome                                                                               | Sample size: intervention group | Sample size: control group | Estimate (95% CI/ p value/ SD)              | Estimate adjusted for                                                                                               |
|------------------------------------|--------------------------------------|-----------------------------------------------------------|---------------------------------------------------------------------------------------|---------------------------------|----------------------------|---------------------------------------------|---------------------------------------------------------------------------------------------------------------------|
|                                    |                                      |                                                           |                                                                                       |                                 |                            |                                             | training ( $\pm 3$ years), and site of fellowship (2 pairs needed to be matched across sites)                       |
| Emans (2008) <sup>25</sup>         | Faculty 3 years after implementation | Faculty 3 years before implementation                     | Number of promotions - <i>male faculty only</i>                                       | Unclear                         | Unclear                    | 17% increase (NR)                           | Unadjusted                                                                                                          |
|                                    | Faculty 3 years after implementation | Faculty 3 years before implementation                     | Number of promotions - <i>female faculty only</i>                                     | Unclear                         | Unclear                    | 56% increase (NR)                           | Unadjusted                                                                                                          |
|                                    | Faculty 3 years after implementation | Faculty 3 years before implementation                     | Number of promotions - <i>URM faculty only</i>                                        | Unclear                         | Unclear                    | 60% increase (NR)                           | Unadjusted                                                                                                          |
|                                    | Faculty 3 years after implementation | Faculty 3 years before implementation                     | Number of promotions - <i>Asian faculty only</i>                                      | Unclear                         | Unclear                    | 60% increase (NR)                           | Unadjusted                                                                                                          |
| Guevara (2018) <sup>28</sup>       | Interview applications scholars      | Interview applications non-scholars                       | Percentage of people who received any kind of position promotion                      | 76                              | 48                         | 67.1% vs 58.3% (p=0.32)                     | Adjusted for age, gender, race/ethnicity, application year, change of institutions, and rank at time of application |
|                                    | Interview applications scholars      | Interview applications non-scholars                       | Retention in academic position (% of people)                                          | 76                              | 48                         | 84.2% vs 75% (p=0.21)                       |                                                                                                                     |
| Kohlwes (2006) <sup>32</sup>       | Programme residents (PRIME)          | Other program residents (UCSF internal medicine programs) | Percentage of people asked to be a chief resident                                     | 32                              | 185                        | 21.8% vs 9.2% (p=0.03)                      | Unadjusted                                                                                                          |
| Kohlwes (2016) <sup>33</sup>       | Programme residents (PRIME)          | Non-PRIME programme residents                             | Percentage of alumni with an academic appointment                                     | 71                              | 98                         | 71.4% vs 67% (chi-squared=0.370, p=0.5430)  | Unadjusted                                                                                                          |
|                                    | Programme residents (PRIME)          | Non-PRIME programme residents                             | Influence of research experience during residency on career choice (% strongly agree) | 71                              | 98                         | 63.4% vs 46.4% (chi-squared=4.757, p=0.029) |                                                                                                                     |

| First author (Year of publication) | Intervention group*                      | Control group*                                            | Outcome                                                                                                           | Sample size: intervention group | Sample size: control group | Estimate (95% CI/ p value/ SD)              | Estimate adjusted for                                                                                                                                                                                                                                                                                    |
|------------------------------------|------------------------------------------|-----------------------------------------------------------|-------------------------------------------------------------------------------------------------------------------|---------------------------------|----------------------------|---------------------------------------------|----------------------------------------------------------------------------------------------------------------------------------------------------------------------------------------------------------------------------------------------------------------------------------------------------------|
|                                    |                                          |                                                           | or agree on questionnaire)                                                                                        |                                 |                            |                                             |                                                                                                                                                                                                                                                                                                          |
|                                    | Programme residents (PRIME)              | Non-PRIME programme residents                             | Influence of success with research during residency on career choice (% strongly agree or agree on questionnaire) | 71                              | 98                         | 36.6% vs 23.5% (chi-squared=3.458, p=0.063) |                                                                                                                                                                                                                                                                                                          |
| Ockene (2017) <sup>38</sup>        | Programme participants                   | Non-programme participants                                | Percentage of people promoted to associate professor                                                              | 29                              | 188                        | 72% vs 32% (p<0.001)                        | Adjusted for equivalent time in rank                                                                                                                                                                                                                                                                     |
| Ries (2009) <sup>40</sup>          | NCLAM programme participants             | Non-NCLAM programme participants hired during same period | Faculty retention after 8-year probationary period (univariate analysis)                                          | 120                             | 719                        | HR=1.77 (95% CI: 1.20-2.61, p=0.004)        | Unadjusted                                                                                                                                                                                                                                                                                               |
|                                    | NCLAM programme participants             | Non-NCLAM programme participants hired during same period | Faculty retention after 8-year probationary period (multivariate analysis)                                        | 120                             | 719                        | HR = 1.67 (95% CI: 1.11-2.50, p=0.01)       | Date of hire, gender and URM faculty were included as covariates                                                                                                                                                                                                                                         |
| Ries (2012) <sup>41</sup>          | NCLAM programme participants (1999-2006) | Matched non-NCLAM programme participants (1999-2006)      | 8-year probationary period retention rate (% of people retained)                                                  | 113                             | 202                        | 67% vs 56% (p=0.04)                         | Matched for: (1) gender, (2) academic series (research versus clinical primary job description), (3) initial academic rank/step (academic experience when hired), (4) hire date (within 12 months, to control for temporal changes in internal and external institutional variables), and (5) department |
| <b>Recruitment</b>                 |                                          |                                                           |                                                                                                                   |                                 |                            |                                             |                                                                                                                                                                                                                                                                                                          |
| Brandt (2018) <sup>19</sup>        | Research residents                       | Clinical residents                                        | Percentage of people who entered first job in academic practice                                                   | 43                              | 284                        | 34% vs 20% (p=0.0001)                       | Unadjusted                                                                                                                                                                                                                                                                                               |
|                                    | Research residents                       | Clinical residents (before                                | Percentage of people                                                                                              | 43                              | 87                         | 20% vs 14% (NR)                             | Unadjusted                                                                                                                                                                                                                                                                                               |

| First author (Year of publication) | Intervention group*            | Control group*                                                                                                                     | Outcome                                                     | Sample size: intervention group | Sample size: control group | Estimate (95% CI/ p value/ SD)                       | Estimate adjusted for                                                                                                                                                                                                      |
|------------------------------------|--------------------------------|------------------------------------------------------------------------------------------------------------------------------------|-------------------------------------------------------------|---------------------------------|----------------------------|------------------------------------------------------|----------------------------------------------------------------------------------------------------------------------------------------------------------------------------------------------------------------------------|
|                                    | (after implementing programme) | implementing programme)                                                                                                            | who currently or once held a full-time academic appointment |                                 |                            |                                                      |                                                                                                                                                                                                                            |
| Dannels (2008) <sup>23</sup>       | Programme participants         | Two control groups: Applied but not accepted non-programme participants & general mid-career faculty women (also non-participants) | Highest rank/ position professor                            | 53                              | 25 & 172                   | 69.8% vs 48% vs 68.6% (NR)                           | Unadjusted but faculty control group matched on academic rank, department chair status, race/ethnicity, discipline, degree type, basic sciences vs clinical department, age, medical school ownership, and awards ranking. |
|                                    | Programme participants         | Two control groups: Applied but not accepted non-programme participants & general mid-career faculty women (also non-participants) | Highest rank/ position department chair/ director           | 52                              | 27 & 160                   | 25% vs 18.5% vs 15.6% (NR)                           |                                                                                                                                                                                                                            |
|                                    | Programme participants         | Two control groups: Applied but not accepted non-programme participants & general mid-career faculty women (also non-participants) | Highest rank/ position dean and above                       | 52                              | 27 & 160                   | 11.5% vs 11.1% vs 4.4% (NR)                          |                                                                                                                                                                                                                            |
|                                    | Programme participants         | Two control groups: Applied but not accepted non-programme participants & general mid-career faculty women (also non-participants) | Academic title of chair or above                            | 52                              | 27 & 160                   | 63.5% vs 37.0% vs 22.5% (chi-squared=29.96, p<0.001) |                                                                                                                                                                                                                            |
| Emans (2008) <sup>25</sup>         | Faculty 5 years                | Faculty year of                                                                                                                    | Percentage of professors                                    | Unclear                         | Unclear                    | 12% vs 14% (NR)                                      | Unadjusted                                                                                                                                                                                                                 |

| First author<br>(Year of<br>publication) | Intervention<br>group*                               | Control group*                                 | Outcome                                                    | Sample size:<br>intervention<br>group | Sample size:<br>control group | Estimate (95% CI/<br>p value/ SD) | Estimate adjusted for |
|------------------------------------------|------------------------------------------------------|------------------------------------------------|------------------------------------------------------------|---------------------------------------|-------------------------------|-----------------------------------|-----------------------|
|                                          | after programme<br>implementation                    | programme<br>implementation                    | - <i>female only</i>                                       |                                       |                               |                                   |                       |
|                                          | Faculty 5 years<br>after programme<br>implementation | Faculty year of<br>programme<br>implementation | Percentage of associate<br>professors - <i>female only</i> | Unclear                               | Unclear                       | 30% vs 21%<br>(p=0.023)           |                       |
|                                          | Faculty 5 years<br>after programme<br>implementation | Faculty year of<br>programme<br>implementation | Percentage of assistant<br>professors - <i>female only</i> | Unclear                               | Unclear                       | 44% vs 34% (NR)                   |                       |
|                                          | Faculty 5 years<br>after programme<br>implementation | Faculty year of<br>programme<br>implementation | Percentage of instructors<br>- <i>female only</i>          | Unclear                               | Unclear                       | 58% vs 53% (NR)                   |                       |
|                                          | Faculty 5 years<br>after programme<br>implementation | Faculty year of<br>programme<br>implementation | Percentage of professors<br>- <i>URM only</i>              | Unclear                               | Unclear                       | 3% vs 3% (NR)                     |                       |
|                                          | Faculty 5 years<br>after programme<br>implementation | Faculty year of<br>programme<br>implementation | Percentage of associate<br>professors - <i>URM only</i>    | Unclear                               | Unclear                       | 3% vs 2% (NR)                     |                       |
|                                          | Faculty 5 years<br>after programme<br>implementation | Faculty year of<br>programme<br>implementation | Percentage of assistant<br>professors - <i>URM only</i>    | Unclear                               | Unclear                       | 4% vs 5% (NR)                     |                       |
|                                          | Faculty 5 years<br>after programme<br>implementation | Faculty year of<br>programme<br>implementation | Percentage of instructors<br>- <i>URM only</i>             | Unclear                               | Unclear                       | 8% vs 8% (NR)                     |                       |
|                                          | Faculty 5 years<br>after programme<br>implementation | Faculty year of<br>programme<br>implementation | Percentage of professors<br>- <i>Asian only</i>            | Unclear                               | Unclear                       | 2% vs 0% (NR)                     |                       |
|                                          | Faculty 5 years<br>after programme<br>implementation | Faculty year of<br>programme<br>implementation | Percentage of associate<br>professors - <i>Asian only</i>  | Unclear                               | Unclear                       | 6% vs 3% (p=0.023)                |                       |
|                                          | Faculty 5 years<br>after programme                   | Faculty year of<br>programme                   | Percentage of assistant<br>professors - <i>Asian only</i>  | Unclear                               | Unclear                       | 16% vs 9%<br>(p=0.001)            |                       |

| First author (Year of publication) | Intervention group*                                                                                                                  | Control group*                                                                         | Outcome                                                                      | Sample size: intervention group | Sample size: control group | Estimate (95% CI/ p value/ SD)                                                                | Estimate adjusted for |
|------------------------------------|--------------------------------------------------------------------------------------------------------------------------------------|----------------------------------------------------------------------------------------|------------------------------------------------------------------------------|---------------------------------|----------------------------|-----------------------------------------------------------------------------------------------|-----------------------|
|                                    | implementation                                                                                                                       | implementation                                                                         |                                                                              |                                 |                            |                                                                                               |                       |
|                                    | Faculty 5 years after programme implementation                                                                                       | Faculty year of programme implementation                                               | Percentage of instructors - <i>Asian only</i>                                | Unclear                         | Unclear                    | 12% vs 12% (NR)                                                                               |                       |
| Goldenberg (2012) <sup>26</sup>    | Programme trainees (academic practice physicians only)                                                                               | Non-programme trainees                                                                 | Time from fellowship entry to assistant professor                            | 11                              | 9                          | Median 3.5 years vs 7 years (p<0.001)                                                         | Unadjusted            |
| Joshua Smith (2014) <sup>30</sup>  | Two intervention groups: Residents with protected research time and completing degree, & residents with just protected research time | Residents without protected research time                                              | Percentage of residents for which their first job is an academic appointment | 15 & 24                         | 23                         | 93.3% vs 58.3% vs 30.4% (p=0.046 comparing research time, p<0.001 comparing no research time) | Unadjusted            |
| Khot (2011) <sup>31</sup>          | NIH associates who entered academic medicine                                                                                         | Non-associates who entered academic medicine (identified from faculty roster database) | Academic rank achieved - full professor                                      | 1577                            | 27821                      | Ratio 1.57 (95% CI: 1.49-1.66, p<0.001)                                                       | Unadjusted            |
|                                    | NIH associates who entered academic medicine                                                                                         | Non-associates who entered academic medicine (identified from faculty roster database) | Academic rank achieved - chair                                               | 1577                            | 27821                      | Ratio 2.0 (95% CI: 1.78-2.24, p<0.001)                                                        |                       |
|                                    | NIH associates who entered academic medicine                                                                                         | Non-associates who entered academic medicine (identified from faculty roster database) | Academic rank achieved - dean                                                | 1577                            | 27821                      | Ratio 2.97 (95% CI: 2.21-3.98, p<0.001)                                                       |                       |

| First author (Year of publication) | Intervention group*                                | Control group*                                                                         | Outcome                                                                                                                           | Sample size: intervention group | Sample size: control group | Estimate (95% CI/ p value/ SD)                                             | Estimate adjusted for |
|------------------------------------|----------------------------------------------------|----------------------------------------------------------------------------------------|-----------------------------------------------------------------------------------------------------------------------------------|---------------------------------|----------------------------|----------------------------------------------------------------------------|-----------------------|
|                                    | NIH associates who entered academic medicine       | Non-associates who entered academic medicine (identified from faculty roster database) | Active faculty appointments in the top 10 schools                                                                                 | 626                             | 6038                       | Ratio 1.34 (95% CI: 1.15-1.56)                                             |                       |
|                                    | NIH associates who entered academic medicine       | Non-associates who entered academic medicine (identified from faculty roster database) | Active faculty appointments in the top 20 schools                                                                                 | 626                             | 6038                       | Ratio 1.47 (95% CI: 1.33-1.63)                                             |                       |
| Sheridan (2010) <sup>42</sup>      | Intervention-participating departments             | Non-intervention participating departments                                             | Percentage of female faculty hired before and after workshop implementation                                                       | 17                              | 9                          | Precise estimate not reported - see Figure 1 in paper for details (p<0.05) | Unadjusted            |
| Sweeny (2019) <sup>47</sup>        | After programme implementation participants        | Before programme implementation participants                                           | Number of new principal investigators recruited                                                                                   | NR                              | NR                         | 55 vs 17 (NR)                                                              | Unadjusted            |
| Valantine (2014) <sup>43</sup>     | University faculty where programme was implemented | Faculty at 6 peer universities                                                         | Change in female faculty as a percentage of total faculty; <i>including assistant, associate, and full professors</i> (2004-2010) | 1219                            | 17000                      | 5.8% vs 4.5% (p=0.011)                                                     | Unadjusted            |
|                                    | University faculty where programme was implemented | Faculty at 6 peer universities                                                         | Change in female faculty as a percentage of total faculty; <i>just assistant professors</i> (2004-2010)                           | 420                             | 7362                       | 4.7% vs 5.0% (p=0.573)                                                     |                       |
|                                    | University faculty where programme was implemented | Faculty at 6 peer universities                                                         | Change in female faculty as a percentage of total faculty; <i>just associate professors</i> (2004-2010)                           | 370                             | 4546                       | 5.8% vs 5.1% (p=0.385)                                                     |                       |

| First author (Year of publication) | Intervention group*                                | Control group*                     | Outcome                                                                                                                           | Sample size: intervention group | Sample size: control group | Estimate (95% CI/ p value/ SD) | Estimate adjusted for                                                                                                      |
|------------------------------------|----------------------------------------------------|------------------------------------|-----------------------------------------------------------------------------------------------------------------------------------|---------------------------------|----------------------------|--------------------------------|----------------------------------------------------------------------------------------------------------------------------|
|                                    | University faculty where programme was implemented | Faculty at 6 peer universities     | Change in female faculty as a percentage of total faculty; <i>just full professors</i> (2004-2010)                                | 429                             | 5092                       | 5.2% vs 4.0% (p=0.003)         | Unadjusted                                                                                                                 |
|                                    | University faculty where programme was implemented | National faculty cohort            | Change in female faculty as a percentage of total faculty; <i>including assistant, associate, and full professors</i> (2004-2010) | 1219                            | 116996                     | 5.8% vs 4.0% (p=0.001)         |                                                                                                                            |
|                                    | University faculty where programme was implemented | National faculty cohort            | Change in female faculty as a percentage of total faculty; <i>just assistant professors</i> (2004-2010)                           | 420                             | 56509                      | 4.7% vs 3.6% (p=0.340)         |                                                                                                                            |
|                                    | University faculty where programme was implemented | National faculty cohort            | Change in female faculty as a percentage of total faculty; <i>just associate professors</i> (2004-2010)                           | 370                             | 27842                      | 5.8% vs 4.1% (p=0.868)         |                                                                                                                            |
|                                    | University faculty where programme was implemented | National faculty cohort            | Change in female faculty as a percentage of total faculty; <i>just full professors</i> (2004-2010)                                | 429                             | 31645                      | 5.2% vs 3.7% (p=0.001)         |                                                                                                                            |
| <b>Publications</b>                |                                                    |                                    |                                                                                                                                   |                                 |                            |                                |                                                                                                                            |
| Brandt (2018) <sup>19</sup>        | Research residents                                 | Clinical residents                 | Publication productivity over career                                                                                              | 43                              | 284                        | Median 14 vs 4 (p<0.0001)      | Unadjusted                                                                                                                 |
|                                    | Research residents                                 | Clinical residents                 | Publication productivity during residency                                                                                         | 43                              | 284                        | Median 10 vs 2.5 (p<0.0001)    |                                                                                                                            |
| Ehlers (2018) <sup>24</sup>        | Programme participants                             | Matched non-programme participants | Number of publications at 5-years post-fellowship                                                                                 | 70                              | 70                         | Median 8 vs 5 (p=0.041)        | Matching criteria included fellowship program (CV or GI), gender, years of post-MD graduate training ( $\pm 1$ year for 65 |
|                                    | Programme participants                             | Matched non-programme participants | Number of first-author publications at 5-years                                                                                    | 70                              | 70                         | Median 4 vs 2 (p=0.002)        |                                                                                                                            |



| First author (Year of publication) | Intervention group*    | Control group*                     | Outcome                                                               | Sample size: intervention group | Sample size: control group | Estimate (95% CI/ p value/ SD)              | Estimate adjusted for                                                                                                                                                                                                                                                                                                                                                       |
|------------------------------------|------------------------|------------------------------------|-----------------------------------------------------------------------|---------------------------------|----------------------------|---------------------------------------------|-----------------------------------------------------------------------------------------------------------------------------------------------------------------------------------------------------------------------------------------------------------------------------------------------------------------------------------------------------------------------------|
|                                    |                        |                                    | post-fellowship                                                       |                                 |                            |                                             | pairs and $\pm 3$ years for 5 pairs), age at the time of starting fellowship training ( $\pm 3$ years), and site of fellowship (2 pairs needed to be matched across sites)                                                                                                                                                                                                  |
|                                    | Programme participants | Matched non-programme participants | H-Index (as of year when studies was conducted - January 2018)        | 70                              | 70                         | Median 11 vs 7 (p=0.013)                    | Time since matriculation into fellowship was included as a covariate. Matching criteria included fellowship program (CV or GI), gender, years of post-MD graduate training ( $\pm 1$ year for 65 pairs and $\pm 3$ years for 5 pairs), age at the time of starting fellowship training ( $\pm 3$ years), and site of fellowship (2 pairs needed to be matched across sites) |
| Goldenberg (2012) <sup>26</sup>    | Programme trainees     | Non-programme trainees             | Annual number of peer-reviewed publications 3-4 years post-fellowship | 11                              | 9                          | Median 3.5 vs 1 (p=0.01)                    | Unadjusted                                                                                                                                                                                                                                                                                                                                                                  |
| Grisso (2017) <sup>27</sup>        | Intervention group     | Control group (no intervention)    | Increase in total no. of publications 2009 to 2012                    | 62                              | 70                         | Rate Ratio 0.80 (95% CI: 0.63-1.02, p=0.07) | Statistical tests were adjusted to account for correlation induced by clustered design using generalized estimating equations. Both within-person factors (age, years in rank, race) and unit-level factors (intervention assignment) were modelled simultaneously                                                                                                          |
|                                    | Intervention group     | Control group (no intervention)    | Increase in first author publications 2009 to 2012                    | 62                              | 70                         | Rate Ratio 1.00 (95% CI: 0.67-1.50, p=0.99) |                                                                                                                                                                                                                                                                                                                                                                             |
|                                    | Intervention group     | Control group (no intervention)    | Increase in total no. of peer review publications 2009 to 2012        | 62                              | 70                         | Rate Ratio 0.95 (95% CI: 0.68-1.33, p=0.78) |                                                                                                                                                                                                                                                                                                                                                                             |
|                                    | Intervention group     | Control group (no intervention)    | Increase in first author peer review publications 2009 to 2012        | 62                              | 70                         | Rate Ratio 1.06 (95% CI: 0.58-1.95, p=0.85) |                                                                                                                                                                                                                                                                                                                                                                             |

| First author (Year of publication) | Intervention group*                                                                                                                  | Control group*                                  | Outcome                                                                     | Sample size: intervention group | Sample size: control group | Estimate (95% CI/ p value/ SD)                                                                   | Estimate adjusted for                                                                                               |
|------------------------------------|--------------------------------------------------------------------------------------------------------------------------------------|-------------------------------------------------|-----------------------------------------------------------------------------|---------------------------------|----------------------------|--------------------------------------------------------------------------------------------------|---------------------------------------------------------------------------------------------------------------------|
| Guevara (2018) <sup>28</sup>       | Interview applications scholars                                                                                                      | Interview applications non-scholars             | Total no. of publications (mean) from point of application to December 2013 | 76                              | 48                         | 27.2 vs 33.0 (p=0.47, SD=30.0 vs 58.8)                                                           | Adjusted for age, gender, race/ethnicity, application year, change of institutions, and rank at time of application |
|                                    | Interview applications scholars                                                                                                      | Interview applications non-scholars             | H-Index (as of December 2013)                                               | 76                              | 48                         | 12.5 vs 10.9 (p=0.32, SD=7.9 vs 10.2)                                                            |                                                                                                                     |
| Harrison (2020) <sup>29</sup>      | Participants after intervention implementation                                                                                       | Participants before intervention implementation | Mean number of publications (in 5 years) - <i>residents only</i>            | Unclear                         | Unclear                    | 7.0 vs 4.4 (p=0.263, SD= 4.47 vs 1.82)                                                           | Unadjusted                                                                                                          |
|                                    | Participants after intervention implementation                                                                                       | Participants before intervention programme      | Mean number of publications (in 5 years) - <i>faculty only</i>              | Unclear                         | Unclear                    | 16.6 vs 12.8 (p=0.197, SD=4.39 vs 4.15)                                                          |                                                                                                                     |
| Joshua Smith (2014) <sup>30</sup>  | Two intervention groups: Residents with protected research time and completing degree, & residents with just protected research time | Residents without protected research time       | Number of publications (mean)                                               | 17 & 27                         | 24                         | 10.3 vs 5.30 vs 1.29 (p=0.001 comparing to research time, p<0.001 comparing to no research time) | Unadjusted                                                                                                          |
|                                    | Two intervention groups: Residents with protected research time and completing degree, & residents with just protected research time | Residents without protected research time       | Number of first-author publications (mean)                                  | 17 & 27                         | 24                         | 4.06 vs 2.30 vs 0.46 (p=0.017 comparing to research time, p<0.001 comparing to no research time) |                                                                                                                     |
|                                    | Two intervention groups: Residents with protected                                                                                    | Residents without protected research time       | Impact factor of publications (mean)                                        | 17 & 27                         | 24                         | 32.3 vs 17.8 vs 2.69 (p=0.001 comparing to                                                       |                                                                                                                     |

| First author<br>(Year of<br>publication) | Intervention<br>group*                                                                                                               | Control group*                                   | Outcome                                                                                                          | Sample size:<br>intervention<br>group | Sample size:<br>control group | Estimate (95% CI/<br>p value/ SD)                                                                | Estimate adjusted for            |
|------------------------------------------|--------------------------------------------------------------------------------------------------------------------------------------|--------------------------------------------------|------------------------------------------------------------------------------------------------------------------|---------------------------------------|-------------------------------|--------------------------------------------------------------------------------------------------|----------------------------------|
|                                          | research time and completing degree, & residents with just protected research time                                                   |                                                  |                                                                                                                  |                                       |                               | research time, p<0.001 comparing to no research time)                                            |                                  |
|                                          | Two intervention groups: Residents with protected research time and completing degree, & residents with just protected research time | Residents without protected research time        | Adjusted impact factor of publications (mean)                                                                    | 17 & 27                               | 24                            | 65.4 vs 36.1 vs 5.17 (p=0.005 comparing to research time, p<0.001 comparing to no research time) | Adjusted for level of authorship |
| Klimas (2017) <sup>45</sup>              | Programme participants                                                                                                               | Non-programme participants                       | Total number of published papers at the end of the one-year fellowship                                           | 4                                     | 4                             | 7 vs 1 (p=0.1)                                                                                   | Unadjusted                       |
| Kohlwes (2016) <sup>33</sup>             | Programme residents                                                                                                                  | Non-programme residents                          | Percentage of alumni who published research they had started during residency (first-author peer-review article) | 71                                    | 92                            | 64.3% vs 40.2% (chi-squared=9.213, p=0.002)                                                      | Unadjusted                       |
| Löwe (2008) <sup>48</sup>                | Intervention residents                                                                                                               | Control residents (from two different locations) | Percentage of people who completed one or more original publications with first authorship in the last year      | 15                                    | 22                            | 46.7% vs 22.7% (p=0.13)                                                                          | Unadjusted                       |
|                                          | Intervention residents                                                                                                               | Control residents (from two different locations) | Percentage of people who completed one or more original publications with co-authorship in the last year         | 15                                    | 22                            | 60% vs 18.2% (p=0.01)                                                                            |                                  |

| First author (Year of publication) | Intervention group*                                          | Control group*                                   | Outcome                                                                                                       | Sample size: intervention group | Sample size: control group | Estimate (95% CI/ p value/ SD)  | Estimate adjusted for |
|------------------------------------|--------------------------------------------------------------|--------------------------------------------------|---------------------------------------------------------------------------------------------------------------|---------------------------------|----------------------------|---------------------------------|-----------------------|
|                                    | Intervention residents                                       | Control residents (from two different locations) | Percentage of people who completed one or more review or meta-analysis with first authorship in the last year | 15                              | 22                         | 0% vs 9.1% (p=0.5)              |                       |
|                                    | Intervention residents                                       | Control residents (from two different locations) | Percentage of people who completed one or more review or meta-analysis with co-authorship in the last year    | 15                              | 22                         | 0% vs 9.1% (p=0.5)              |                       |
|                                    | Intervention residents                                       | Control residents (from two different locations) | Percentage of people who completed one or more book article with first authorship in the last year            | 15                              | 22                         | 26.7% vs 18.2% (p=0.69)         |                       |
|                                    | Intervention residents                                       | Control residents (from two different locations) | Percentage of people who completed one or more book article with co-authorship in the last year               | 15                              | 22                         | 20% vs 4.6% (p=0.28)            |                       |
| Merani (2014) <sup>46</sup>        | Additional degree trainees: Masters trainees, & PhD trainees | Clinical-only trainees                           | Percentage of surgeons involved in research publication during training with any authorship role              | 72 & 33                         | 218                        | 81.9% vs 100% vs 38.1% (p<0.05) | Unadjusted            |
|                                    | Additional degree trainees: Masters trainees, & PhD trainees | Clinical-only trainees                           | Percentage of surgeons involved in research publication during training with principal author role            | 72 & 33                         | 218                        | 58.3% vs 100% vs 27.1% (p<0.05) |                       |
|                                    | Additional degree trainees: Masters                          | Clinical-only trainees                           | Percentage of surgeons involved in research                                                                   | 72 & 33                         | 218                        | 19.4% vs 12.1% vs 5% (p<0.05)   |                       |

| First author<br>(Year of<br>publication) | Intervention<br>group*                                                | Control group*                                                           | Outcome                                                                                                    | Sample size:<br>intervention<br>group | Sample size:<br>control group | Estimate (95% CI/<br>p value/ SD)                | Estimate adjusted for                                      |
|------------------------------------------|-----------------------------------------------------------------------|--------------------------------------------------------------------------|------------------------------------------------------------------------------------------------------------|---------------------------------------|-------------------------------|--------------------------------------------------|------------------------------------------------------------|
|                                          | trainees, & PhD<br>trainees                                           |                                                                          | publication during<br>training with senior<br>author role                                                  |                                       |                               |                                                  |                                                            |
|                                          | Additional degree<br>trainees: Masters<br>trainees, & PhD<br>trainees | Clinical-only trainees                                                   | Percentage of surgeons<br>involved in research<br>publication post-training<br>with any authorship role    | 69 & 32                               | 201                           | 81.2% vs 90.6% vs<br>44.3% (p<0.05)              |                                                            |
|                                          | Additional degree<br>trainees: Masters<br>trainees, & PhD<br>trainees | Clinical-only trainees                                                   | Percentage of surgeons<br>involved in research<br>publication post-training<br>with principal author role  | 69 & 32                               | 201                           | 56.5% vs 71.9% vs<br>26.4% (p<0.05)              |                                                            |
|                                          | Additional degree<br>trainees: Masters<br>trainees, & PhD<br>trainees | Clinical-only trainees                                                   | Percentage of surgeons<br>involved in research<br>publications post-training<br>with senior author role    | 69 & 32                               | 201                           | 37.7% vs 46.9% vs<br>14.9% (p<0.05)              |                                                            |
| Mills (2011) <sup>36</sup>               | Programme<br>participants                                             | Non-programme<br>participants                                            | Percentage of<br>participants with<br>publication after<br>graduation                                      | 232                                   | 295                           | 69% vs 34%<br>(p<0.001)                          | Unadjusted                                                 |
|                                          | Programme<br>participants                                             | Non-programme<br>participants                                            | Median number of<br>publications after<br>graduation                                                       | 232                                   | 295                           | 2 vs 0 (p<0.001)                                 |                                                            |
|                                          | Programme<br>participants                                             | Non-programme<br>participants                                            | Likelihood of publishing in<br>the future                                                                  | 232                                   | 295                           | OR=3.7 (95% CI:<br>2.5-5.6)                      | Adjusted for gender and<br>publications prior to programme |
| Nasab (2019) <sup>37</sup>               | Programme<br>participants                                             | Non-programme<br>participants (before<br>implementation of<br>programme) | Number of published<br>papers during course<br>period (2015-2018) - <i>just<br/>junior faculty members</i> | 14                                    | 26                            | Mean 9.21 vs 4<br>(p=0.003, SD=8.1<br>vs. 5.21)  | Unadjusted                                                 |
|                                          | Programme<br>participants                                             | Non-programme<br>participants (before<br>implementation of               | Number of published<br>papers during course<br>period (2015-2018) - <i>just</i>                            | 35                                    | 11                            | Mean 4.31 vs 2<br>(p=0.008, SD=3.44<br>vs. 1.67) |                                                            |

| First author (Year of publication) | Intervention group*                       | Control group*                                                  | Outcome                                                                                     | Sample size: intervention group | Sample size: control group | Estimate (95% CI/ p value/ SD)                | Estimate adjusted for |
|------------------------------------|-------------------------------------------|-----------------------------------------------------------------|---------------------------------------------------------------------------------------------|---------------------------------|----------------------------|-----------------------------------------------|-----------------------|
|                                    |                                           | programme)                                                      | <i>fellows</i>                                                                              |                                 |                            |                                               |                       |
|                                    | Programme participants                    | Non-programme participants (before implementation of programme) | Journal impact factor during course period (2015-2018) - <i>just junior faculty members</i> | 14                              | 26                         | Mean 3.09 vs 4.57 (p=0.67, SD=1.54 vs. 5.03)  |                       |
|                                    | Programme participants                    | Non-programme participants (before implementation of programme) | Journal impact factor during course period (2015-2018) - <i>just fellows</i>                | 35                              | 11                         | Mean 5.46 vs 3.03 (p=0.776, SD=9.81 vs. 1.72) |                       |
| Patel (2018) <sup>39</sup>         | Programme cohorts (2011/2012 - 2014/2015) | Pre-programme cohorts (2007/2008 - 2010/2011)                   | Likelihood of publishing one or more clinical research articles (%)                         | 35                              | 36                         | 77% vs 44% (chi-squared=7.9, p=0.005)         | Unadjusted            |
|                                    | Programme cohorts (2011/2012 - 2014/2015) | Pre-programme cohorts (2007/2008 - 2010/2011)                   | Number of published clinical research articles during residency (mean)                      | 35                              | 36                         | 2.09 vs 1.56 (NR)                             |                       |

\*Groups are reported as described by authors. \*\*Inconsistent data reported and referred to in tables and text; data represented here is extracted from text.

Abbreviations: BCRP - Boston Combined Residency Programme; CCWAS - Culture that is conducive to women's academic success; NCLAM - National Center of Leadership in Academic Medicine; NR - Not Reported; PRIME - Primary Medical Education programme; SWIF - Strain-based work interference with family; TWIF - Time-based work interference with family; UCSF - University of California San Francisco; URM - Underrepresented Minorities.
